# Supplementary material
Source: PubMed Central journal article supplement (PMC3370746)
Supplement: supp_56.6.2879_TableS1.pdf [file supp_56.6.2879_TableS1.pdf]

**Supplementary Table 1: Complete list of dysregulated genes in the microarray under sub-inhibitory concentrations of ciprofloxacin in the *lon* mutant compared to the wild type PAO1 under sub-inhibitory concentrations.**

| PA number | Gene Name   | Fold change | p-eBayes | Gene Description                                      |
|-----------|-------------|-------------|----------|-------------------------------------------------------|
| PA0040    |             | -2.18       | 0.00     | conserved hypothetical protein                        |
| PA0066    |             | -2.28       | 0.00     | conserved hypothetical protein                        |
| PA0069    |             | -5.46       | 0.00     | conserved hypothetical protein                        |
| PA0085    |             | 2.57        | 0.00     | conserved hypothetical protein                        |
| PA0171    |             | 2.01        | 0.00     | hypothetical protein                                  |
| PA0253    |             | -2.66       | 0.01     | probable transcriptional regulator                    |
| PA0266    | <i>gabT</i> | 2.30        | 0.00     | 4-aminobutyrate aminotransferase                      |
| PA0277    |             | 4.05        | 0.00     | conserved hypothetical protein                        |
| PA0386    |             | -2.03       | 0.00     | probable oxidase                                      |
| PA0394    |             | -2.01       | 0.00     | conserved hypothetical protein                        |
| PA0426    | <i>mexB</i> | 3.30        | 0.01     | RND multidrug efflux transporter MexB                 |
| PA0447    | <i>gcdH</i> | 2.42        | 0.02     | glutaryl-CoA dehydrogenase                            |
| PA0577    | <i>dnaG</i> | -2.10       | 0.00     | DNA primase                                           |
| PA0604    |             | 3.03        | 0.01     | probable binding protein component of ABC transporter |
| PA0606    |             | 2.13        | 0.01     | probable permease of ABC transporter                  |
| PA0610    | <i>prtN</i> | -12.65      | 0.00     | transcriptional regulator PrtN                        |
| PA0611    | <i>prtR</i> | -3.00       | 0.00     | transcriptional regulator PrtR                        |
| PA0612    |             | -12.87      | 0.00     | hypothetical protein                                  |
| PA0613    |             | -6.51       | 0.00     | hypothetical protein                                  |
| PA0614    |             | -8.25       | 0.00     | hypothetical protein                                  |
| PA0615    |             | -9.09       | 0.00     | hypothetical protein                                  |
| PA0616    |             | -6.57       | 0.00     | hypothetical protein                                  |
| PA0617    |             | -7.24       | 0.00     | probable bacteriophage protein                        |
| PA0618    |             | -2.21       | 0.00     | probable bacteriophage protein                        |
| PA0619    |             | -3.50       | 0.00     | probable bacteriophage protein                        |
| PA0620    |             | -9.93       | 0.00     | probable bacteriophage protein                        |
| PA0621    |             | -3.07       | 0.00     | conserved hypothetical protein                        |

|        |             |       |      |                                              |
|--------|-------------|-------|------|----------------------------------------------|
| PA0622 |             | -5.10 | 0.00 | probable bacteriophage protein               |
| PA0623 |             | -2.06 | 0.00 | probable bacteriophage protein               |
| PA0624 |             | -7.63 | 0.00 | hypothetical protein                         |
| PA0625 |             | -5.61 | 0.00 | hypothetical protein                         |
| PA0626 |             | -7.32 | 0.00 | hypothetical protein                         |
| PA0627 |             | -6.30 | 0.00 | conserved hypothetical protein               |
| PA0628 |             | -6.95 | 0.00 | conserved hypothetical protein               |
| PA0629 |             | -7.79 | 0.00 | conserved hypothetical protein               |
| PA0630 |             | -7.20 | 0.00 | hypothetical protein                         |
| PA0631 |             | -6.46 | 0.00 | hypothetical protein                         |
| PA0632 |             | -9.07 | 0.00 | hypothetical protein                         |
| PA0633 |             | -5.46 | 0.00 | hypothetical protein                         |
| PA0634 |             | -8.14 | 0.00 | hypothetical protein                         |
| PA0635 |             | -6.25 | 0.01 | hypothetical protein                         |
| PA0636 |             | -9.30 | 0.00 | hypothetical protein                         |
| PA0637 |             | -6.93 | 0.00 | conserved hypothetical protein               |
| PA0638 |             | -7.61 | 0.00 | probable bacteriophage protein               |
| PA0640 |             | -4.05 | 0.00 | probable bacteriophage protein               |
| PA0641 |             | -8.94 | 0.00 | probable bacteriophage protein               |
| PA0642 |             | -7.71 | 0.00 | hypothetical protein                         |
| PA0643 |             | -6.42 | 0.00 | hypothetical protein                         |
| PA0644 |             | -7.98 | 0.00 | hypothetical protein                         |
| PA0645 |             | -7.42 | 0.00 | hypothetical protein                         |
| PA0646 |             | -7.25 | 0.00 | hypothetical protein                         |
| PA0648 |             | -6.98 | 0.00 | hypothetical protein                         |
| PA0649 | <i>trpG</i> | -3.18 | 0.00 | anthranilate synthase component II           |
| PA0650 | <i>trpD</i> | -3.46 | 0.00 | anthranilate phosphoribosyltransferase       |
| PA0651 | <i>trpC</i> | -2.43 | 0.00 | indole-3-glycerol-phosphate synthase         |
| PA0654 | <i>speD</i> | -2.11 | 0.00 | S-adenosylmethionine decarboxylase proenzyme |
| PA0669 |             | -3.08 | 0.00 | probable DNA polymerase alpha chain          |
| PA0670 |             | -5.31 | 0.00 | hypothetical protein                         |
| PA0671 |             | -5.59 | 0.00 | hypothetical protein                         |

|        |             |       |      |                                                  |
|--------|-------------|-------|------|--------------------------------------------------|
| PA0782 | <i>putA</i> | 3.35  | 0.00 | proline dehydrogenase PutA                       |
| PA0783 | <i>putP</i> | 4.74  | 0.00 | sodium/proline symporter PutP                    |
| PA0789 |             | 2.21  | 0.00 | probable amino acid permease                     |
| PA0807 |             | -2.81 | 0.00 | conserved hypothetical protein                   |
| PA0808 |             | -3.75 | 0.00 | hypothetical protein                             |
| PA0835 | <i>pta</i>  | 3.80  | 0.01 | phosphate acetyltransferase                      |
| PA0836 |             | 3.76  | 0.00 | probable acetate kinase                          |
| PA0855 |             | 2.02  | 0.00 | hypothetical protein                             |
| PA0865 | <i>hpd</i>  | 2.80  | 0.00 | 4-hydroxyphenylpyruvate dioxygenase              |
| PA0870 | <i>phhC</i> | 3.11  | 0.00 | aromatic amino acid aminotransferase             |
| PA0871 | <i>phhB</i> | 3.67  | 0.00 | pterin-4-alpha-carbinolamine dehydratase         |
| PA0872 | <i>phhA</i> | 2.84  | 0.00 | phenylalanine-4-hydroxylase                      |
| PA0906 |             | -2.26 | 0.00 | probable transcriptional regulator               |
| PA0907 |             | -4.28 | 0.00 | hypothetical protein                             |
| PA0908 |             | -2.82 | 0.00 | hypothetical protein                             |
| PA0910 |             | -3.82 | 0.00 | hypothetical protein                             |
| PA0911 |             | -3.47 | 0.00 | hypothetical protein                             |
| PA0922 |             | -2.41 | 0.00 | hypothetical protein                             |
| PA0958 | <i>oprD</i> | 4.42  | 0.00 | outer membrane porin protein OprD precursor      |
| PA0962 |             | 2.57  | 0.01 | probable dna-binding stress protein              |
| PA0985 |             | -4.64 | 0.00 | probable colicin-like toxin                      |
| PA1049 | <i>pdxH</i> | 2.16  | 0.00 | pyridoxine 5-phosphate oxidase                   |
| PA1069 |             | 2.60  | 0.00 | hypothetical protein                             |
| PA1071 | <i>braF</i> | 2.08  | 0.00 | branched-chain amino acid transport protein BraF |
| PA1072 | <i>braE</i> | 2.12  | 0.00 | branched-chain amino acid transport protein BraE |
| PA1074 | <i>braC</i> | 3.38  | 0.00 | branched-chain amino acid transport protein BraC |
| PA1076 |             | 4.54  | 0.00 | hypothetical protein                             |
| PA1151 | <i>imm2</i> | -2.54 | 0.00 | pyocin S2 immunity protein                       |
| PA1152 |             | -2.09 | 0.01 | hypothetical protein                             |
| PA1196 |             | 2.41  | 0.01 | probable transcriptional regulator               |
| PA1288 |             | 5.09  | 0.00 | probable outer membrane protein                  |
| PA1337 | <i>ansB</i> | 2.68  | 0.00 | glutaminase-asparaginase                         |

|        |             |       |      |                                                       |
|--------|-------------|-------|------|-------------------------------------------------------|
| PA1338 | <i>ggt</i>  | 2.76  | 0.00 | gamma-glutamyltranspeptidase precursor                |
| PA1339 |             | 2.79  | 0.00 | probable ATP-binding component of ABC transporter     |
| PA1340 |             | 2.24  | 0.00 | probable permease of ABC transporter                  |
| PA1341 |             | 2.21  | 0.00 | probable permease of ABC transporter                  |
| PA1342 |             | 5.42  | 0.00 | probable binding protein component of ABC transporter |
| PA1414 |             | 2.10  | 0.02 | hypothetical protein                                  |
| PA1418 |             | 2.09  | 0.00 | probable sodium:solute symport protein                |
| PA1419 |             | 2.35  | 0.00 | probable transporter                                  |
| PA1420 |             | 2.39  | 0.00 | hypothetical protein                                  |
| PA1421 | <i>gbuA</i> | 3.75  | 0.00 | agmatinase                                            |
| PA1498 | <i>pykF</i> | 2.52  | 0.01 | pyruvate kinase I                                     |
| PA1546 | <i>hemN</i> | 2.75  | 0.00 | oxygen-independent coproporphyrinogen III oxidase     |
| PA1557 |             | 3.36  | 0.01 | probable cytochrome oxidase subunit (cbb3-type)       |
| PA1647 |             | 2.03  | 0.00 | probable sulfate transporter                          |
| PA1656 |             | 4.40  | 0.00 | hypothetical protein                                  |
| PA1657 |             | 11.03 | 0.00 | conserved hypothetical protein                        |
| PA1658 |             | 3.45  | 0.00 | conserved hypothetical protein                        |
| PA1659 |             | 2.60  | 0.00 | hypothetical protein                                  |
| PA1665 |             | 2.06  | 0.00 | hypothetical protein                                  |
| PA1673 |             | 3.29  | 0.00 | hypothetical protein                                  |
| PA1746 |             | 2.19  | 0.00 | hypothetical protein                                  |
| PA1865 |             | -2.72 | 0.01 | hypothetical protein                                  |
| PA1866 |             | -3.14 | 0.00 | hypothetical protein                                  |
| PA1892 |             | 2.33  | 0.00 | hypothetical protein                                  |
| PA1893 |             | 2.40  | 0.00 | hypothetical protein                                  |
| PA1894 |             | 3.10  | 0.00 | hypothetical protein                                  |
| PA1895 |             | 2.70  | 0.00 | hypothetical protein                                  |
| PA1896 |             | 2.83  | 0.00 | hypothetical protein                                  |
| PA1897 |             | 2.48  | 0.00 | hypothetical protein                                  |
| PA1948 | <i>rbsC</i> | 2.13  | 0.00 | membrane protein component of ABC ribose transporter  |
| PA2008 | <i>fahA</i> | 3.00  | 0.00 | fumarylacetoacetase                                   |
| PA2009 | <i>hmgA</i> | 8.12  | 0.00 | homogentisate 1,2-dioxygenase                         |

|        |             |       |      |                                                |
|--------|-------------|-------|------|------------------------------------------------|
| PA2026 |             | 3.43  | 0.00 | conserved hypothetical protein                 |
| PA2040 |             | 2.44  | 0.00 | probable glutamine synthetase                  |
| PA2041 |             | 2.09  | 0.00 | probable amino acid permease                   |
| PA2064 | <i>pcoB</i> | -2.00 | 0.03 | copper resistance protein B precursor          |
| PA2080 | <i>kynU</i> | 2.04  | 0.00 | hypothetical protein                           |
| PA2119 |             | 2.81  | 0.00 | alcohol dehydrogenase (Zn-dependent)           |
| PA2126 |             | 2.18  | 0.01 | conserved hypothetical protein                 |
| PA2127 |             | 3.84  | 0.00 | conserved hypothetical protein                 |
| PA2193 | <i>hcnA</i> | 5.33  | 0.00 | hydrogen cyanide synthase HcnA                 |
| PA2194 | <i>hcnB</i> | 3.21  | 0.00 | hydrogen cyanide synthase HcnB                 |
| PA2195 | <i>hcnC</i> | 2.16  | 0.00 | hydrogen cyanide synthase HcnC                 |
| PA2227 |             | 2.10  | 0.02 | probable transcriptional regulator             |
| PA2252 |             | 2.78  | 0.00 | probable AGCS sodium/alanine/glycine symporter |
| PA2288 |             | -2.14 | 0.00 | hypothetical protein                           |
| PA2321 |             | -2.04 | 0.00 | gluconokinase                                  |
| PA2501 |             | 3.02  | 0.00 | hypothetical protein                           |
| PA2539 |             | 2.20  | 0.00 | conserved hypothetical protein                 |
| PA2624 | <i>idh</i>  | 2.24  | 0.01 | isocitrate dehydrogenase                       |
| PA2753 |             | 2.59  | 0.01 | hypothetical protein                           |
| PA2754 |             | 2.25  | 0.00 | conserved hypothetical protein                 |
| PA2760 |             | 3.63  | 0.00 | probable outer membrane protein                |
| PA2840 |             | -2.41 | 0.03 | probable ATP-dependent RNA helicase            |
| PA2886 |             | 2.03  | 0.03 | hypothetical protein                           |
| PA2951 | <i>etfA</i> | 2.00  | 0.00 | electron transfer flavoprotein alpha-subunit   |
| PA2952 | <i>etfB</i> | 2.52  | 0.00 | electron transfer flavoprotein beta-subunit    |
| PA3007 | <i>lexA</i> | -2.20 | 0.01 | repressor protein LexA                         |
| PA3021 |             | 3.95  | 0.00 | hypothetical protein                           |
| PA3054 |             | 2.04  | 0.00 | hypothetical protein                           |
| PA3068 | <i>gdhB</i> | 2.10  | 0.00 | conserved hypothetical protein                 |
| PA3126 | <i>ibpA</i> | -3.97 | 0.00 | heat-shock protein IbpA                        |
| PA3221 | <i>csaA</i> | 2.20  | 0.00 | CsaA protein                                   |
| PA3234 |             | 2.36  | 0.00 | probable sodium:solute symporter               |

|        |              |       |      |                                             |
|--------|--------------|-------|------|---------------------------------------------|
| PA3278 |              | 3.24  | 0.02 | hypothetical protein                        |
| PA3309 |              | 5.48  | 0.01 | conserved hypothetical protein              |
| PA3326 |              | 2.41  | 0.00 | probable Clp-family ATP-dependent protease  |
| PA3337 | <i>rfaD</i>  | 3.13  | 0.01 | ADP-L-glycero-D-mannoheptose 6-epimerase    |
| PA3347 |              | 2.26  | 0.00 | hypothetical protein                        |
| PA3356 |              | 3.26  | 0.00 | conserved hypothetical protein              |
| PA3413 |              | -2.39 | 0.00 | conserved hypothetical protein              |
| PA3414 |              | -2.69 | 0.00 | hypothetical protein                        |
| PA3458 |              | 2.71  | 0.01 | probable transcriptional regulator          |
| PA3562 |              | 2.08  | 0.00 | probable phosphotransferase system enzyme I |
| PA3613 |              | 6.09  | 0.00 | hypothetical protein                        |
| PA3616 |              | -2.18 | 0.00 | conserved hypothetical protein              |
| PA3661 |              | 2.19  | 0.00 | hypothetical protein                        |
| PA3837 |              | 2.13  | 0.00 | probable permease of ABC transporter        |
| PA3839 |              | 3.07  | 0.03 | probable sodium:sulfate symporter           |
| PA3850 |              | 2.27  | 0.00 | hypothetical protein                        |
| PA3859 |              | 2.25  | 0.00 | probable carboxylesterase                   |
| PA3866 |              | -8.25 | 0.00 | pyocin protein                              |
| PA3876 | <i>narK2</i> | 3.01  | 0.03 | nitrite extrusion protein 2                 |
| PA3877 | <i>narK1</i> | 4.29  | 0.00 | nitrite extrusion protein 1                 |
| PA3880 |              | 2.51  | 0.01 | conserved hypothetical protein              |
| PA3905 |              | 2.37  | 0.00 | hypothetical protein                        |
| PA3906 |              | 2.24  | 0.00 | hypothetical protein                        |
| PA3915 | <i>moaB1</i> | 2.71  | 0.01 | molybdopterin biosynthetic protein B1       |
| PA3919 |              | 2.16  | 0.01 | conserved hypothetical protein              |
| PA4022 |              | 2.59  | 0.00 | probable aldehyde dehydrogenase             |
| PA4220 |              | -3.04 | 0.00 | hypothetical protein                        |
| PA4221 | <i>fptA</i>  | -2.14 | 0.01 | Fe(III)-pyochelin receptor precursor        |
| PA4224 | <i>pchG</i>  | -2.07 | 0.00 | hypothetical protein                        |
| PA4225 | <i>pchF</i>  | -4.90 | 0.00 | pyochelin synthetase                        |
| PA4226 | <i>pchE</i>  | -2.27 | 0.00 | dihydroaeruginic acid synthetase            |
| PA4230 | <i>pchB</i>  | -2.37 | 0.00 | salicylate biosynthesis protein PchB        |

|        |              |       |      |                                           |
|--------|--------------|-------|------|-------------------------------------------|
| PA4328 |              | 2.73  | 0.02 | hypothetical protein                      |
| PA4329 | <i>pykA</i>  | 2.63  | 0.00 | pyruvate kinase II                        |
| PA4348 |              | 2.13  | 0.00 | conserved hypothetical protein            |
| PA4463 |              | 2.08  | 0.01 | conserved hypothetical protein            |
| PA4571 |              | 3.79  | 0.01 | probable cytochrome c                     |
| PA4579 |              | 2.32  | 0.01 | hypothetical protein                      |
| PA4587 | <i>ccpR</i>  | 3.42  | 0.01 | cytochrome c551 peroxidase precursor      |
| PA4605 |              | 2.63  | 0.00 | conserved hypothetical protein            |
| PA4606 |              | 2.51  | 0.00 | conserved hypothetical protein            |
| PA4610 |              | 2.04  | 0.01 | hypothetical protein                      |
| PA4611 |              | 6.23  | 0.00 | hypothetical protein                      |
| PA4625 |              | 2.55  | 0.00 | hypothetical protein                      |
| PA4761 | <i>dnaK</i>  | -2.11 | 0.01 | DnaK protein                              |
| PA4770 | <i>lldP</i>  | 2.94  | 0.00 | L-lactate permease                        |
| PA4771 | <i>lldD</i>  | 2.19  | 0.00 | L-lactate dehydrogenase                   |
| PA4772 |              | 2.08  | 0.00 | probable ferredoxin                       |
| PA4846 | <i>aroQ1</i> | -2.10 | 0.01 | 3-dehydroquinate dehydratase              |
| PA5025 | <i>metY</i>  | 2.52  | 0.00 | homocysteine synthase                     |
| PA5027 |              | 3.67  | 0.01 | hypothetical protein                      |
| PA5030 |              | -2.58 | 0.00 | probable MFS transporter                  |
| PA5053 | <i>hslV</i>  | -4.99 | 0.00 | heat shock protein HslV                   |
| PA5054 | <i>hslU</i>  | -2.30 | 0.00 | heat shock protein HslU                   |
| PA5112 | <i>estA</i>  | 2.25  | 0.00 | esterase EstA                             |
| PA5171 | <i>arcA</i>  | 2.55  | 0.03 | arginine deiminase                        |
| PA5180 |              | -2.36 | 0.00 | conserved hypothetical protein            |
| PA5266 |              | 2.07  | 0.03 | conserved hypothetical protein            |
| PA5296 | <i>rep</i>   | -2.03 | 0.00 | ATP-dependent DNA helicase Rep            |
| PA5303 |              | 2.41  | 0.00 | conserved hypothetical protein            |
| PA5304 | <i>dadA</i>  | 2.84  | 0.00 | D-amino acid dehydrogenase, small subunit |
| PA5312 |              | 2.03  | 0.00 | probable aldehyde dehydrogenase           |
| PA5336 | <i>gmk</i>   | -2.13 | 0.00 | guanylate kinase                          |
| PA5415 | <i>glyA1</i> | 2.05  | 0.03 | serine hydroxymethyltransferase           |

|        |             |       |      |                                                            |
|--------|-------------|-------|------|------------------------------------------------------------|
| PA5436 |             | 2.64  | 0.02 | probable. biotin carboxylase subunit of a transcarboxylase |
| PA5463 |             | -2.77 | 0.00 | hypothetical protein                                       |
| PA5464 |             | -2.13 | 0.00 | hypothetical protein                                       |
| PA5470 |             | -3.61 | 0.00 | probable peptide chain release factor                      |
| PA5471 |             | -2.66 | 0.00 | hypothetical protein                                       |
| PA5485 |             | -2.06 | 0.00 | conserved hypothetical protein                             |
| PA5486 |             | -2.06 | 0.00 | conserved hypothetical protein                             |
| PA5503 |             | -2.04 | 0.00 | probable ATP-binding component of ABC transporter          |
| PA5504 |             | -2.31 | 0.00 | probable permease of ABC transporter                       |
| PA5510 |             | 2.03  | 0.01 | probable transporter                                       |
| PA5561 | <i>atpI</i> | -2.76 | 0.00 | ATP synthase protein I                                     |
| PA5564 | <i>gidB</i> | -2.11 | 0.00 | glucose inhibited division protein B                       |
